# Supplementary material for: Caregiver Depression in a Low-Resource Setting: A Multi-Domain Assessment of PHQ-9, Socio-Demographic Predictors of Major Depressive Disorder Among Family Caregivers of Breast Cancer Patients in Pakistan
Source: Research Square preprint supplement (doi:10.21203/rs.3.rs-6785454/v1), 2025-09-01
Supplement: Supplementary file 1 [file 8286dab4b2e5ed1ecb2cb790.docx]

| Patient Health Questionnaire (PHQ-9) مریض **کی صحت کے لئے سوالنامہ** | |
| --- | --- |
| Now I will be asking you questions about your health (physical & mental health). Now tell me over the last 2 weeks, how often have you been bothered by the following problems?  **اب میں آپ سے آپکی صحت سے متعلق سوال کروں گی (جسمانی اور ذہنی صحت)۔ اب مجھے بتائیں پچھلے دو ہفتوں کے دوران آپ کو مندرجہ ذیل مشکلات نے کتنی بار پریشان کیا.** | |
| 1. Little interest or pleasure in doing things.  **کاموں/ چيزوں میں دلچسبی کم ہو گئی ہو یا مزہ نہ آتا ہو۔(پہلے جو کام اچھے لگتے تھے یا جن کاموں ميں مزہ آتا تھا اب نہ آتا ہو)** | 0-Not at all **بالکل نہیں**  1-Several days **کئی دن**  2-More than half the day **آدھےدنوں سےزیادہ**  3- Nearly every day  **تقریباًہرروز** |
| 2. Feeling down, depressed, or hopeless.  **اداسی، افسردگی، خفگی/خفگان، صحت کا گرا گرا رہنا، پریشان یا نا امید ہونا**۔ | 0-Not at all **بالکل نہیں**  1-Several days **کئی دن**  2-More than half the day **آدھےدنوں سےزیادہ**  3- Nearly every day  **تقریباًہرروز** |
| 3. Trouble falling or staying asleep or sleeping too much.  **صحیح نیند نہ آنا،نیند میں کمی یا زیادتی۔** | 0-Not at all **بالکل نہیں**  1-Several days **کئی دن**  2-More than half the day **آدھےدنوں سےزیادہ**  3- Nearly every day  **تقریباًہرروز** |
| 4. Feeling tired or having little energy.  **تھکاوٹ اورجسمانی توانائی میں کمی محسوس ہوئی۔** | 0-Not at all **بالکل نہیں**  1-Several days **کئی دن**  2-More than half the day **آدھےدنوں سےزیادہ**  3- Nearly every day  **تقریباًہرروز** |
| 5. Poor appetite or overeating.  **بھوک کی کمی یا زیادتی۔** | 0-Not at all **بالکل نہیں**  1-Several days **کئی دن**  2-More than half the day **آدھےدنوں سےزیادہ**  3- Nearly every day  **تقریباًہرروز** |
| 6. Feeling bad about yourself or that you are a failure or have let yourself or your family down.  **اپناآپ برا لگنا یا ایسا محسوس ہونا کہ آپ اپنی اور اپنے خاندان کی امیدوں پر پورا نہیں اُتر پائیں۔** | 0-Not at all **بالکل نہیں**  1-Several days **کئی دن**  2-More than half the day **آدھےدنوں سےزیادہ**  3- Nearly every day  **تقریباًہرروز** |
| 7. Trouble concentrating on things, such as reading the newspaper or watching television.  **کام پرتوجہ نہ دینا مثلاً چیزیں رکھ کے بھول جانا یا ہانڈی میں نمک ڈالنا بھول جانا۔** | 0-Not at all **بالکل نہیں**  1-Several days **کئی دن**  2-More than half the day **آدھےدنوں سےزیادہ**  3- Nearly every day  **تقریباًہرروز** |
| 8. Moving or speaking so slowly that other people could have noticed. Or the opposite being so fidgety or restless that you have been moving around a lot more than usual.  **بات چیت، کا م کاج میں سستی یا بےچینی جودوسروں نےبھی محسوس کی ہو۔** | 0-Not at all **بالکل نہیں**  1-Several days **کئی دن**  2-More than half the day **آدھےدنوں سےزیادہ**  3- Nearly every day  **تقریباًہرروز** |
| 9. Thoughts that you would be better off dead, or of hurting yourself.  **خود کو نقصان پہنچانے کا سوچنا یا ایسا سوچنا کے مر جانا بہتر ہے۔** | 0-Not at all **بالکل نہیں**  1-Several days **کئی دن**  2-More than half the day **آدھےدنوں سےزیادہ**  3- Nearly every day  **تقریباًہرروز** |
| **10. If you had any of above problems, how difficult these problems made it for you to do your work, take care of things at home, or get along with other people?**  **آپکواوپر دی گئی علامات کی وجہ سے گھر کے کام کاج ،گھر کی چیزوں کی دیکھ بھال یا لوگوں کے ساتھ ملنے جلنے میں کتنی مشکل محسوس ہوئی؟** | **بالکل مشکل نہیں ہوئی**  1-Not difficult at all  **تھوڑی مشکل ہوئی**  2-Somewhat difficult  **بہت مشکل ہوئی۔**  3-Very difficult  **انتہائی مشکل ہوئی**  4-Extremely difficult |
