# Supplementary material for: Caregiver Depression in a Low-Resource Setting: A Multi-Domain Assessment of PHQ-9, Socio-Demographic Predictors of Major Depressive Disorder Among Family Caregivers of Breast Cancer Patients in Pakistan
Source: Research Square preprint supplement (doi:10.21203/rs.3.rs-6785454/v1), 2025-09-01
Supplement: Supplementary file 2 [file c0b714993fc218a27d03de1d.docx]

# Supplemenatary Table 1: Baseline Characteristics of Caregivers

| **Characteristic** | **Value** |
| --- | --- |
| Age (years), mean (SD) | 37.84 (12.84) |
| Gender – Female, n (%) | 149 (37.1) |
| Marital Status – Married, n (%) | 307 (76.4) |
| Residential Area – Urban, n (%) | 215 (53.5) |
| Number of Siblings, mean (SD) | 5.21 (2.19) |
| Educational Status, n (%) |  |
| Uneducated | 78 (19.4) |
| Primary | 58 (14.4) |
| Secondary | 137 (34.1) |
| Higher Secondary | 20 (5.0) |
| Diploma/Bachelor’s and above | 109 (27.1) |
| Employment Status, n (%) |  |
| Unemployed | 150 (37.3) |
| Employed Full-Time | 139 (34.6) |
| Employed Part-Time | 103 (25.6) |
| Retired | 10 (2.5) |
| Relationship to Patient, n (%) |  |
| Spouse | 172 (42.8) |
| Offspring | 115 (28.6) |
| Parent | 35 (8.7) |
| Sibling | 39 (9.7) |
| Others | 41 (10.2) |
| Lives with Patient – No, n (%) | 376 (93.5) |
| Family Type – Joint, n (%) | 196 (48.8) |
| Overall Health Status, n (%) |  |
| Poor | 8 (2.0) |
| Fair | 57 (14.2) |
| Good | 192 (47.8) |
| Excellent | 145 (36.1) |
| Chronic Health Conditions, n (%) |  |
| Hypertension | 316 (78.6) |
| Diabetes Mellitus | 32 (8.0) |
| Asthma | 8 (2.0) |
| Cardiac-related Disease | 10 (2.5) |
| Hepatitis | 7 (1.7) |
| Other Chronic Conditions | 29 (7.2) |
| BMI (kg/m²), mean (SD) | 24.43 (4.42) |
| Current Smoker, n (%) | 62 (15.4) |
| Takes Sleeping Pills – No, n (%) | 30 (7.5) |
| Average Sleep Duration (hours), mean (SD) | 7.56 (2.47) |
| Physical Activity (hours/day), mean (SD) | 0.76 (0.91) |
| Past Depression History – No, n (%) | 365 (90.8) |
| Monthly Income (mean (SD)) | 29,017.48 (39,741.39) |
| Financial Support to Patient, n (%) |  |
| None | 119 (29.6) |
| Some | 65 (16.2) |
| Significant | 218 (54.2) |
| Nature of Relationship (coded), n (%) |  |
| 0 | 14 (32.6) |
| 1 | 16 (37.2) |
| 3 | 13 (30.2) |
| Distance to Hospital (km), mean (SD) | 59.11 (67.88) |
| Hospital Visits per Week, mean (SD) | 1.65 (1.42) |
| PHQ-9 Score, mean (SD) | 9.25 (6.13) |
| Depression (PHQ-9 ≥ 5), n (%) | 295 (73.4) |
| Depression Severity, n (%) |  |
| No Depression | 107 (26.6) |
| Mild | 109 (27.1) |
| Moderate | 97 (24.1) |
| Moderately Severe | 66 (16.4) |
| Severe | 23 (5.7) |

# Binomial Logistic Regression

| Model Fit Measures | | | | | | |
| --- | --- | --- | --- | --- | --- | --- |
|  | | | | **Overall Model Test** | | |
| **Model** | **Deviance** | **AIC** | **R²McF** | **χ²** | **df** | **p** |
| 1 | 481.0 | 511.0 | 0.1314 | 72.77 | 14 | <.001 |
| Note. Models estimated using sample size of N=401 | | | | | | |

| Omnibus Likelihood Ratio Tests | | | |
| --- | --- | --- | --- |
| **Predictor** | **χ²** | **df** | **p** |
| Education_of_caregiver | 5.9574 | 4 | 0.202 |
| Overall_health_status_of_the_caregiver | 6.5477 | 3 | 0.088 |
| BMI_of_caregiver | 1.8569 | 1 | 0.173 |
| Monthly_income_of_the_caregiver | 22.7654 | 1 | <.001 |
| Duration_of_Physical_activity_in_caregivers | 11.9283 | 1 | <.001 |
| How_often_the_patient_visits_the_hospital_in_a_week | 0.6720 | 1 | 0.412 |
| Number_of_hours_caregiver_spends_caring_for_patient_per_day | 0.6010 | 1 | 0.438 |
| Average_sleep_duration_in_caregivers | 0.7619 | 1 | 0.383 |
| Whether_the_caregiver_lives_with_the_patient | 3.4949 | 1 | 0.062 |

| Model Coefficients - Depression Score - Transform 12 | | | | | | | |
| --- | --- | --- | --- | --- | --- | --- | --- |
|  | | **95% Confidence Interval** | |  | | | |
| **Predictor** | **Estimate** | **Lower** | **Upper** | **SE** | **Z** | **p** | **Odds ratio** |
| Intercept | 0.34041 | -1.93580 | 2.61663 | 1.16136 | 0.29311 | 0.769 | 1.4055 |
| Education_of_caregiver: |  |  |  |  |  |  |  |
| Primary – Uneducated | 0.25152 | -0.51160 | 1.01465 | 0.38936 | 0.64600 | 0.518 | 1.2860 |
| Secondary – Uneducated | 0.67255 | 0.03087 | 1.31422 | 0.32739 | 2.05425 | 0.040 | 1.9592 |
| Higher – Uneducated | 0.04219 | -1.03860 | 1.12298 | 0.55143 | 0.07651 | 0.939 | 1.0431 |
| Diploma/Bachelor's and Above – Uneducated | 0.16185 | -0.53346 | 0.85716 | 0.35476 | 0.45623 | 0.648 | 1.1757 |
| Overall_health_status_of_the_caregiver: |  |  |  |  |  |  |  |
| Fair – Poor | -0.61042 | -2.23889 | 1.01806 | 0.83087 | -0.73467 | 0.463 | 0.5431 |
| Good – Poor | -0.16526 | -1.71459 | 1.38407 | 0.79049 | -0.20906 | 0.834 | 0.8477 |
| Excellent – Poor | 0.27145 | -1.29043 | 1.83332 | 0.79689 | 0.34063 | 0.733 | 1.3119 |
| BMI_of_caregiver | -0.03397 | -0.08301 | 0.01506 | 0.02502 | -1.35786 | 0.175 | 0.9666 |
| Monthly_income_of_the_caregiver | 1.089e-5 | 4.534e-6 | 1.725e-5 | 3.245e-6 | 3.35726 | <.001 | 1.0000 |
| Duration_of_Physical_activity_in_caregivers | 0.44761 | 0.18755 | 0.70768 | 0.13269 | 3.37345 | <.001 | 1.5646 |
| How_often_the_patient_visits_the_hospital_in_a_week | 0.07322 | -0.10675 | 0.25320 | 0.09183 | 0.79741 | 0.425 | 1.0760 |
| Number_of_hours_caregiver_spends_caring_for_patient_per_day | 0.01433 | -0.02206 | 0.05071 | 0.01856 | 0.77175 | 0.440 | 1.0144 |
| Average_sleep_duration_in_caregivers | 0.03938 | -0.04958 | 0.12834 | 0.04539 | 0.86765 | 0.386 | 1.0402 |
| Whether_the_caregiver_lives_with_the_patient: |  |  |  |  |  |  |  |
| No – Yes | -0.91901 | -1.92663 | 0.08861 | 0.51410 | -1.78760 | 0.074 | 0.3989 |
| Note. Estimates represent the log odds of "Depression Score - Transform 12 = No depression" vs. "Depression Score - Transform 12 = Depression" | | | | | | | |

# Assumption Checks

| Collinearity Statistics | | |
| --- | --- | --- |
|  | **VIF** | **Tolerance** |
| **Education_of_caregiver** | 1.028 | 0.9728 |
| **Overall_health_status_of_the_caregiver** | 1.029 | 0.9714 |
| **BMI_of_caregiver** | 1.016 | 0.9845 |
| **Monthly_income_of_the_caregiver** | 1.031 | 0.9701 |
| **Duration_of_Physical_activity_in_caregivers** | 1.048 | 0.9542 |
| **How_often_the_patient_visits_the_hospital_in_a_week** | 1.045 | 0.9568 |
| **Number_of_hours_caregiver_spends_caring_for_patient_per_day** | 1.083 | 0.9230 |
| **Average_sleep_duration_in_caregivers** | 1.042 | 0.9594 |
| **Whether_the_caregiver_lives_with_the_patient** | 1.018 | 0.9828 |

# Reliability Analysis

| Scale Reliability Statistics | | |
| --- | --- | --- |
|  | **Cronbach's α** | **McDonald's ω** |
| **scale** | 0.8214 | 0.8174 |

| Item Reliability Statistics | | |
| --- | --- | --- |
|  | **If item dropped** | |
|  | **Cronbach's α** | **McDonald's ω** |
| **PHQ_1** | 0.8015 | 0.7971 |
| **PHQ_2** | 0.7904 | 0.7862 |
| **PHQ_3** | 0.7964 | 0.7931 |
| **PHQ_4** | 0.7910 | 0.7872 |
| **PHQ_6** | 0.8167 | 0.8124 |
| **PHQ_5** | 0.8080 | 0.8040 |
| **PHQ_7** | 0.7945 | 0.7901 |
| **PHQ_8** | 0.7894 | 0.7847 |
| **PHQ_9** | 0.8337 | 0.8339 |

# Correlation Heatmap


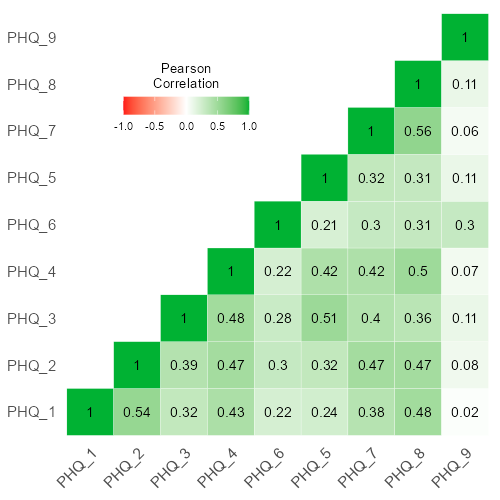


# Exploratory Factor Analysis

| Factor Loadings | | | | |
| --- | --- | --- | --- | --- |
|  | **Factor** | | |  |
|  | **1** | **2** | **3** | **Uniqueness** |
| **PHQ_1** | 0.7801 |  |  | 0.5199 |
| **PHQ_2** | 0.6997 |  |  | 0.4839 |
| **PHQ_3** |  | 0.7121 |  | 0.4342 |
| **PHQ_4** | 0.4365 | 0.3681 |  | 0.5015 |
| **PHQ_5** |  | 0.7240 |  | 0.5292 |
| **PHQ_6** |  |  | 0.5830 | 0.5537 |
| **PHQ_7** | 0.5834 |  |  | 0.5576 |
| **PHQ_8** | 0.7230 |  |  | 0.4609 |
| **PHQ_9** |  |  | 0.5214 | 0.7514 |
| Note. 'Principal axis factoring' extraction method was used in combination with a 'promax' rotation | | | | |

# Factor Statistics

| Summary | | | |
| --- | --- | --- | --- |
| **Factor** | **SS Loadings** | **% of Variance** | **Cumulative %** |
| 1 | 2.2943 | 25.492 | 25.49 |
| 2 | 1.2601 | 14.001 | 39.49 |
| 3 | 0.6533 | 7.259 | 46.75 |

| Inter-Factor Correlations | | | |
| --- | --- | --- | --- |
|  | **1** | **2** | **3** |
| **1** | — | 0.6763 | 0.3599 |
| **2** |  | — | 0.3691 |
| **3** |  |  | — |

# Model Fit

| Model Fit Measures | | | | | | | |
| --- | --- | --- | --- | --- | --- | --- | --- |
|  | **RMSEA 90% CI** | |  | | **Model Test** | | |
| **RMSEA** | **Lower** | **Upper** | **TLI** | **BIC** | **χ²** | **df** | **p** |
| 0.06388 | 0.03736 | 0.09159 | 0.9398 | -40.24 | 31.72 | 12 | 0.002 |

# Assumption Checks

| Bartlett's Test of Sphericity | | |
| --- | --- | --- |
| **χ²** | **df** | **p** |
| 1023 | 36 | <.001 |

| KMO Measure of Sampling Adequacy | |
| --- | --- |
|  | **MSA** |
| **Overall** | 0.8542 |
| **PHQ_1** | 0.8516 |
| **PHQ_2** | 0.8711 |
| **PHQ_3** | 0.8507 |
| **PHQ_4** | 0.8847 |
| **PHQ_5** | 0.8470 |
| **PHQ_6** | 0.8285 |
| **PHQ_7** | 0.8696 |
| **PHQ_8** | 0.8537 |
| **PHQ_9** | 0.6109 |

**Eigenvalues**

# Scree Plot


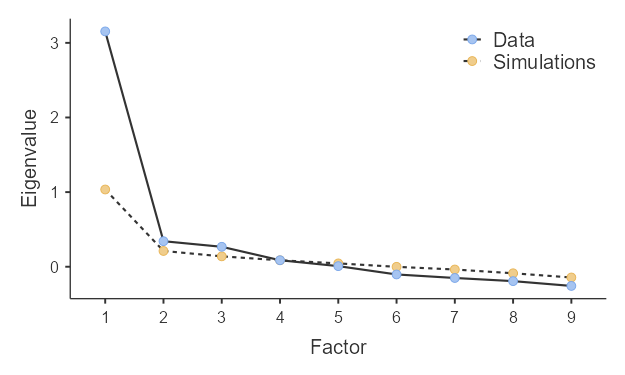


Confirmatory Factor Analysis

| Factor Loadings | | | | | |
| --- | --- | --- | --- | --- | --- |
| **Factor** | **Indicator** | **Estimate** | **SE** | **Z** | **p** |
| **Factor 1** | **PHQ_1** | 0.7355 | 0.05518 | 13.328 | <.001 |
| **PHQ_2** | 0.7945 | 0.05302 | 14.985 | <.001 |
| **PHQ_4** | 0.7890 | 0.05499 | 14.347 | <.001 |
| **PHQ_7** | 0.7579 | 0.05343 | 14.185 | <.001 |
| **PHQ_8** | 0.8179 | 0.05260 | 15.549 | <.001 |
| **Factor 2** | **PHQ_3** | 0.9188 | 0.06371 | 14.421 | <.001 |
| **PHQ_5** | 0.7150 | 0.05896 | 12.127 | <.001 |
| **Factor 3** | **PHQ_6** | 0.8725 | 0.17286 | 5.047 | <.001 |
| **PHQ_9** | 0.1840 | 0.04635 | 3.969 | <.001 |

**Factor Estimates**

| Factor Covariances | | | | | |
| --- | --- | --- | --- | --- | --- |
|  |  | **Estimate** | **SE** | **Z** | **p** |
| **Factor 1** | **Factor 1** | 1.0000ᵃ |  |  |  |
| **Factor 2** | 0.7238 | 0.04518 | 16.020 | <.001 |
| **Factor 3** | 0.3937 | 0.08835 | 4.456 | <.001 |
| **Factor 2** | **Factor 2** | 1.0000ᵃ |  |  |  |
| **Factor 3** | 0.3477 | 0.09070 | 3.834 | <.001 |
| **Factor 3** | **Factor 3** | 1.0000ᵃ |  |  |  |
| ᵃ fixed parameter | | | | | |

# Model Fit

| Test for Exact Fit | | |
| --- | --- | --- |
| **χ²** | **df** | **p** |
| 63.37 | 24 | <.001 |

| Fit Measures | | | | | | |
| --- | --- | --- | --- | --- | --- | --- |
|  | | | **RMSEA 90% CI** | |  | |
| **CFI** | **TLI** | **RMSEA** | **Lower** | **Upper** | **AIC** | **BIC** |
| 0.9606 | 0.9409 | 0.06388 | 0.04498 | 0.08326 | 9544 | 9664 |
